# Supplementary material
Source: MDPI journal article supplement (https://www.mdpi.com/2311-5637/9/8/707)
Supplement: s1 [file s1 › fermentation-2454684-supplementary.pdf]

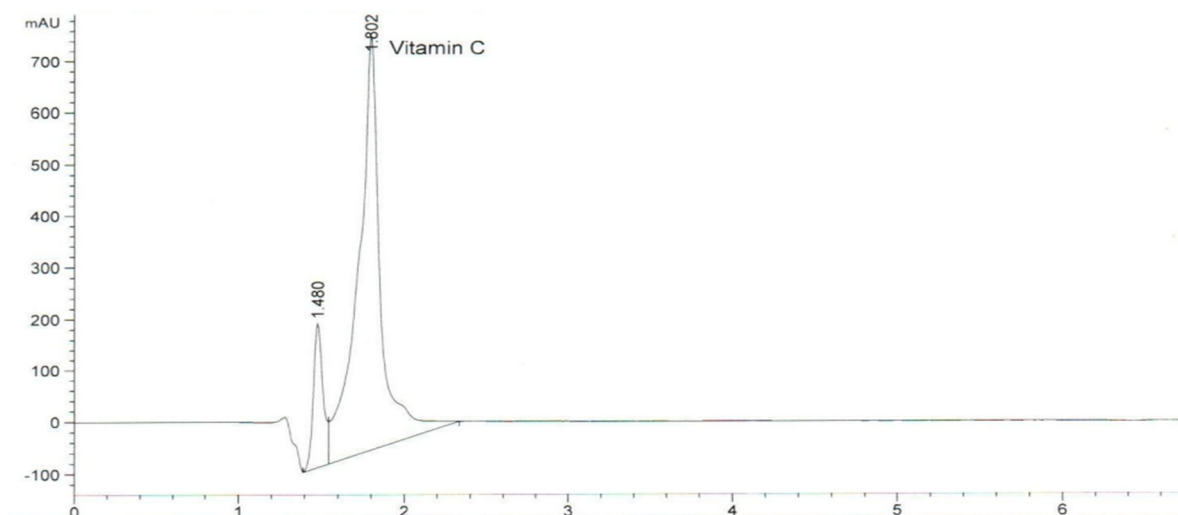

**Figure S1.** HPLC chromatogram for identification of vitamin C standard.

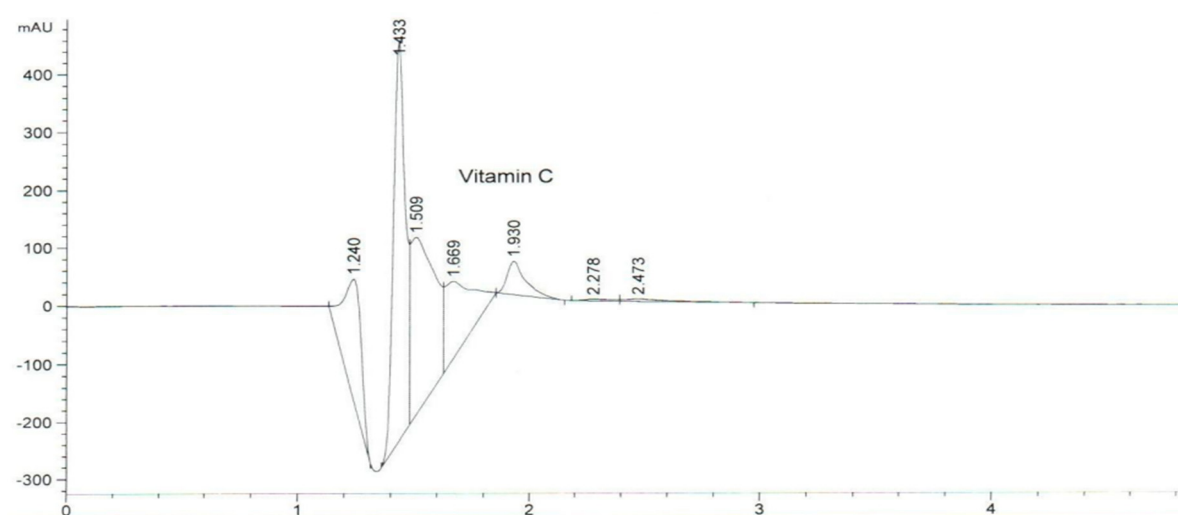

**Figure S2.** HPLC chromatogram for identification of vitamin C in the unfermented *T. fruticosum* leaves.

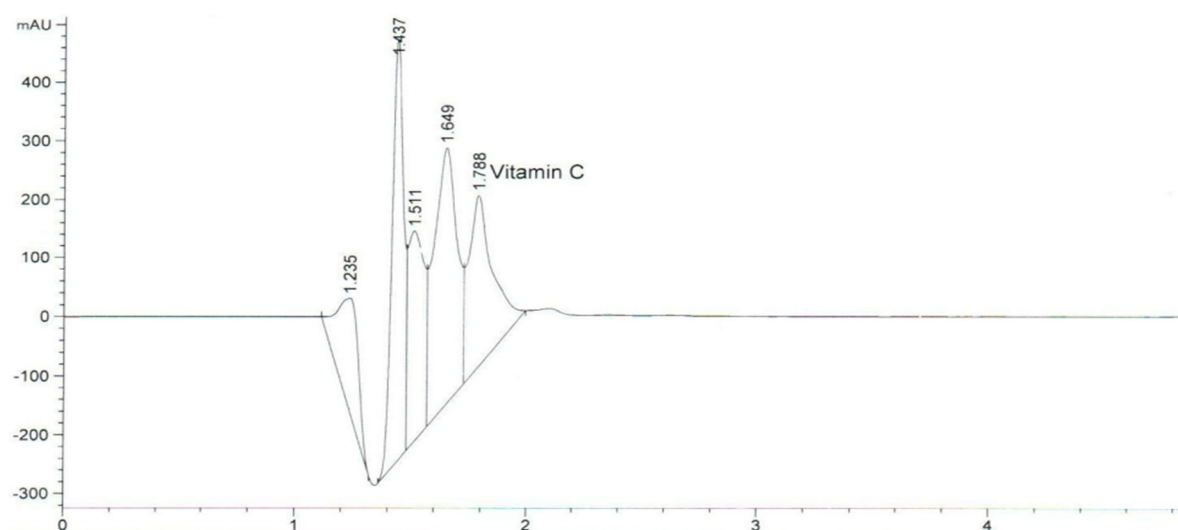

**Figure S3.** HPLC chromatogram for identification of vitamin C in the unfermented *C. dregel* leaves.

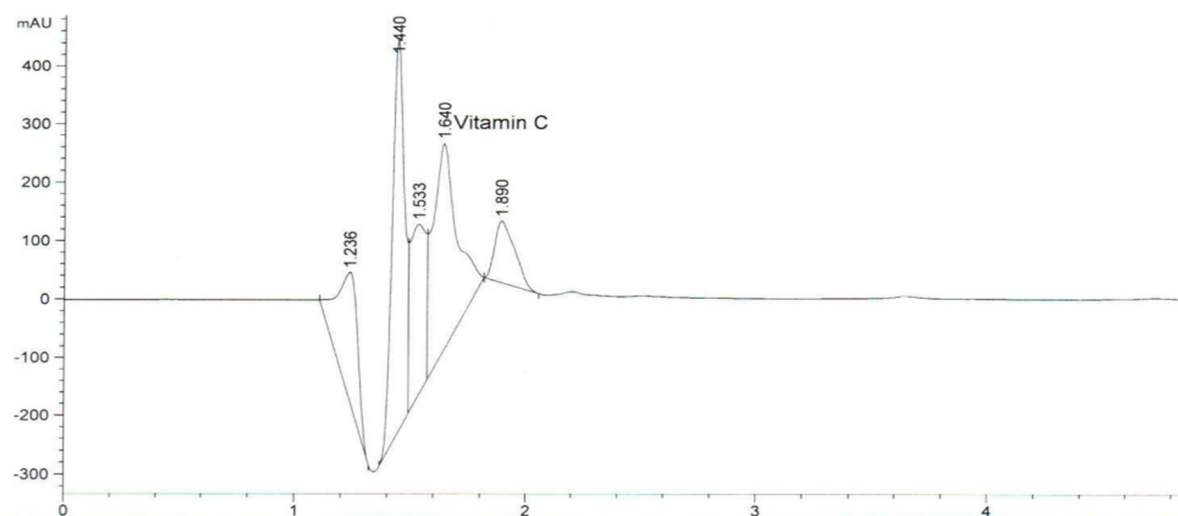

**Figure S4.** HPLC chromatogram for identification of vitamin C in the 3-days fermented *C. dregel* leaves.

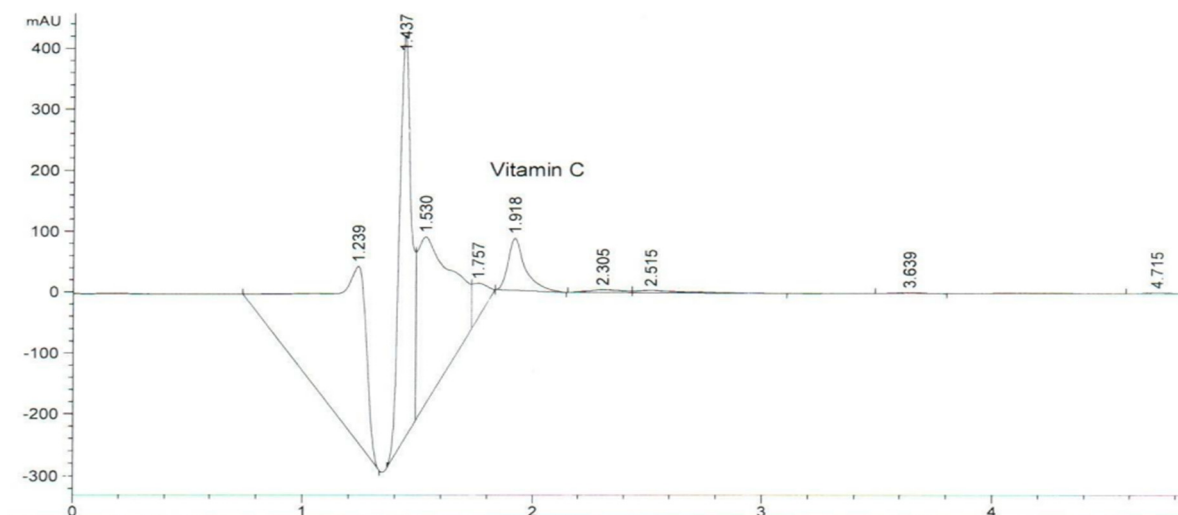

**Figure S5.** HPLC chromatogram for identification of vitamin C in the 5-days fermented *C. dregel* leaves.

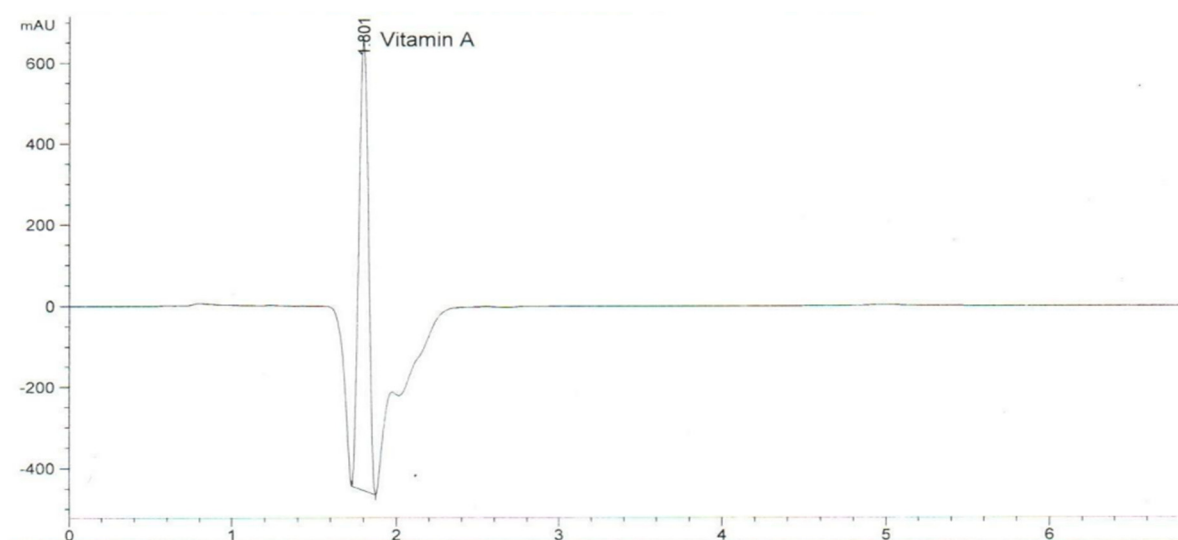

**Figure S6.** HPLC chromatogram for identification of vitamin A standard.

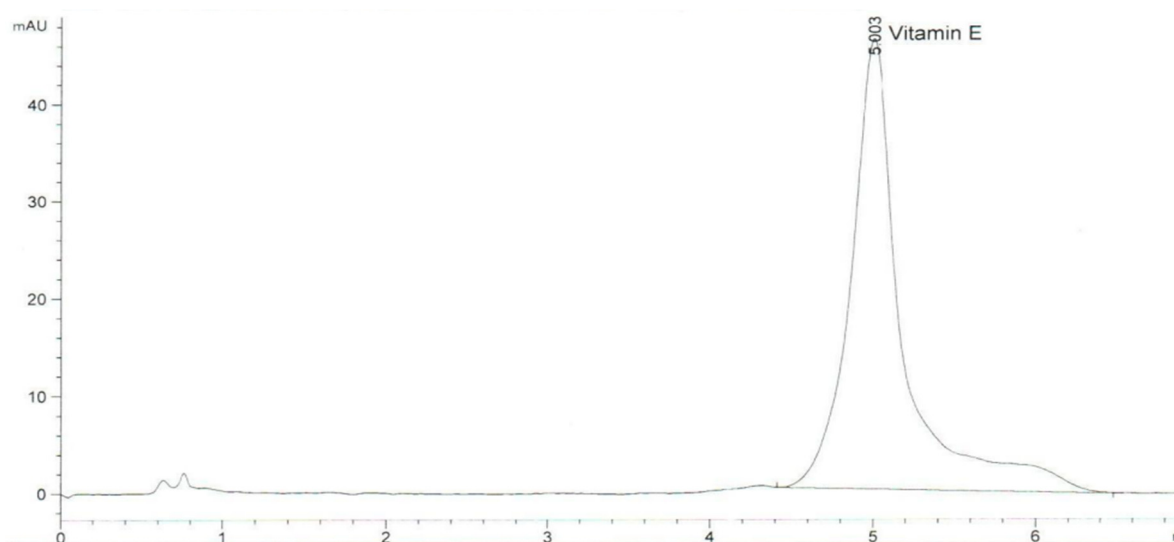

**Figure S7.** HPLC chromatogram for identification of vitamin E standard.

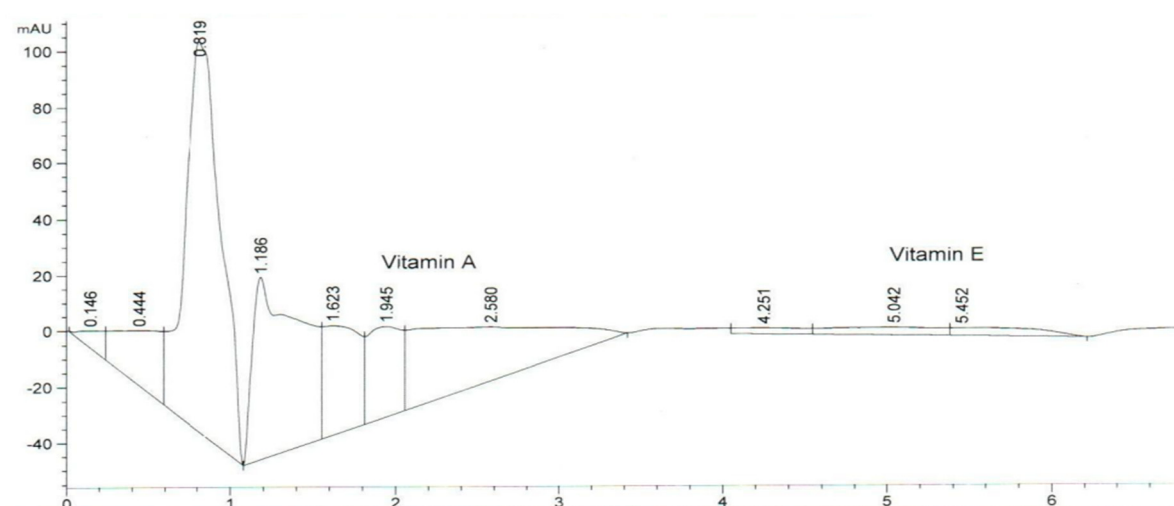

**Figure S8.** HPLC chromatogram for identification of vitamin A and E in the unfermented *T. fruticosum* leaves.

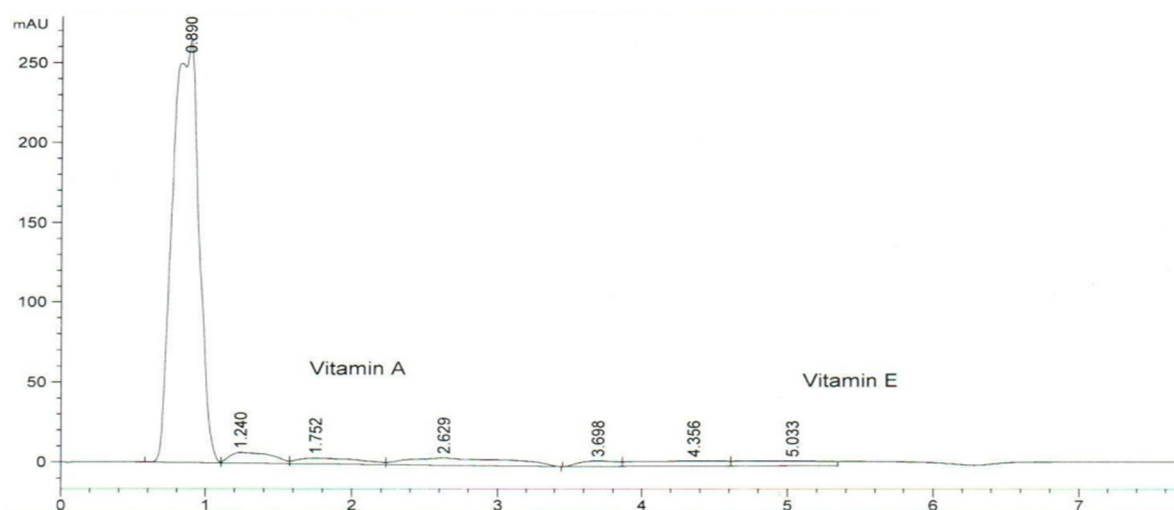

**Figure S9.** HPLC chromatogram for identification of vitamin A and E in the unfermented *C. dregei* leaves.

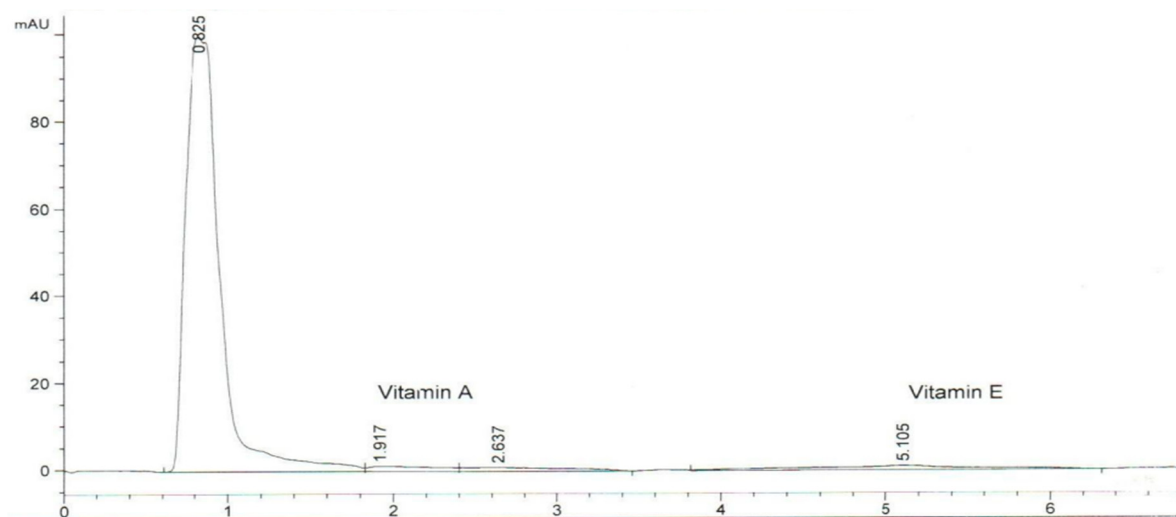

**Figure S10.** HPLC chromatogram for identification of vitamin A and E in the 3-days fermented *C. dregei* leaves.

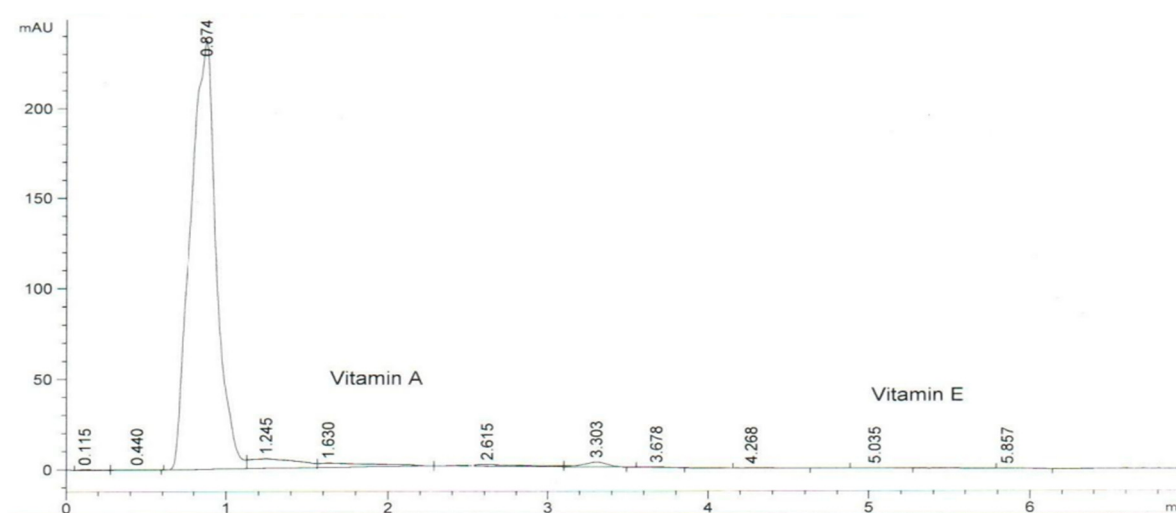

**Figure S11.** HPLC chromatogram for identification of vitamin A and E in the 5-days fermented *C. dregei* leaves.

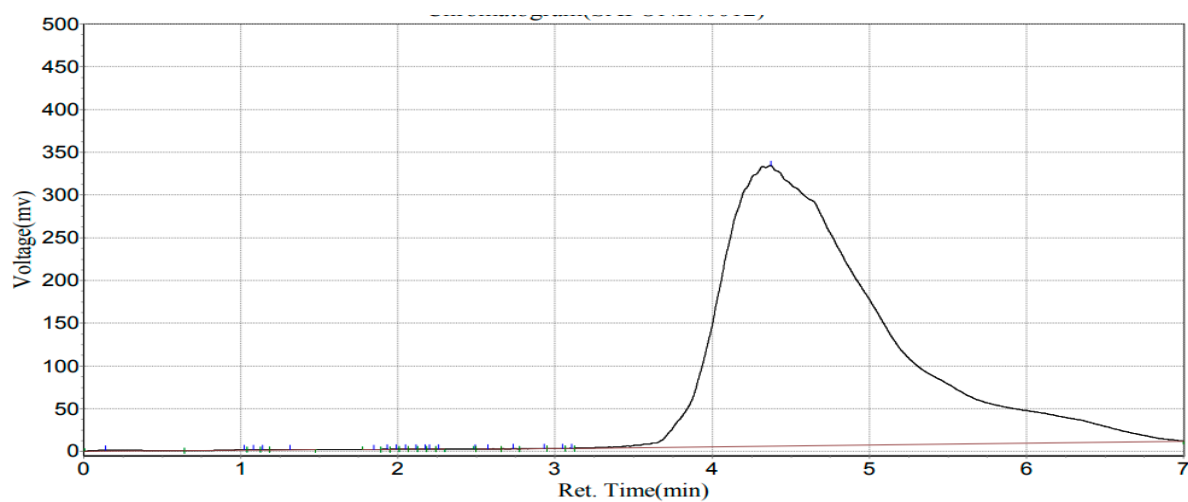

**Figure S12.** HPLC chromatogram for identification of saponin compounds in the unfermented *C. dregei* leaves.

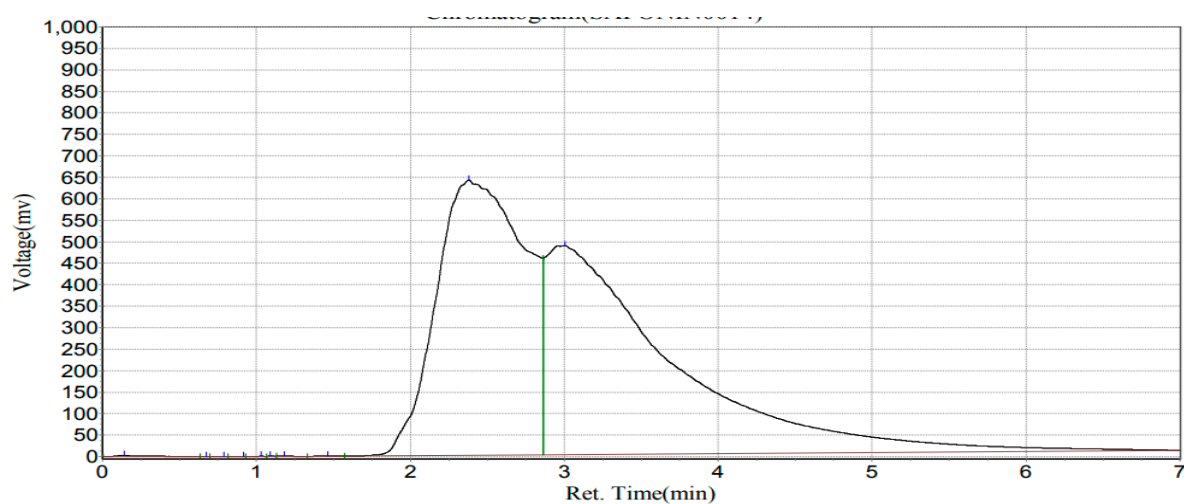

**Figure S13.** HPLC chromatogram for identification of saponin compounds in the 3-days fermented *C. dregei* leaves.

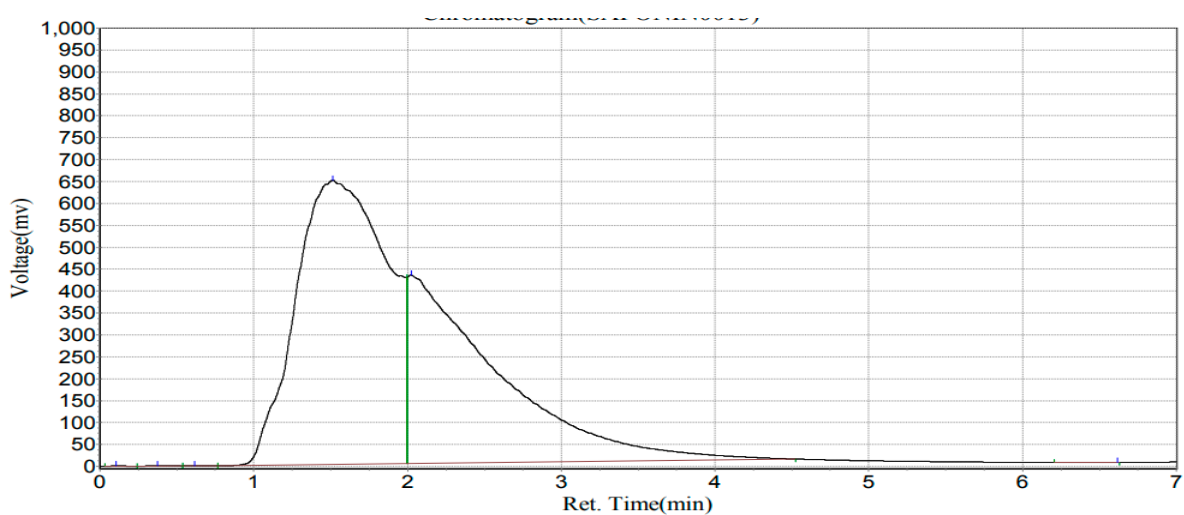

**Figure S14.** HPLC chromatogram for identification of saponin compounds in the 5-days fermented *C. dregei* leaves.

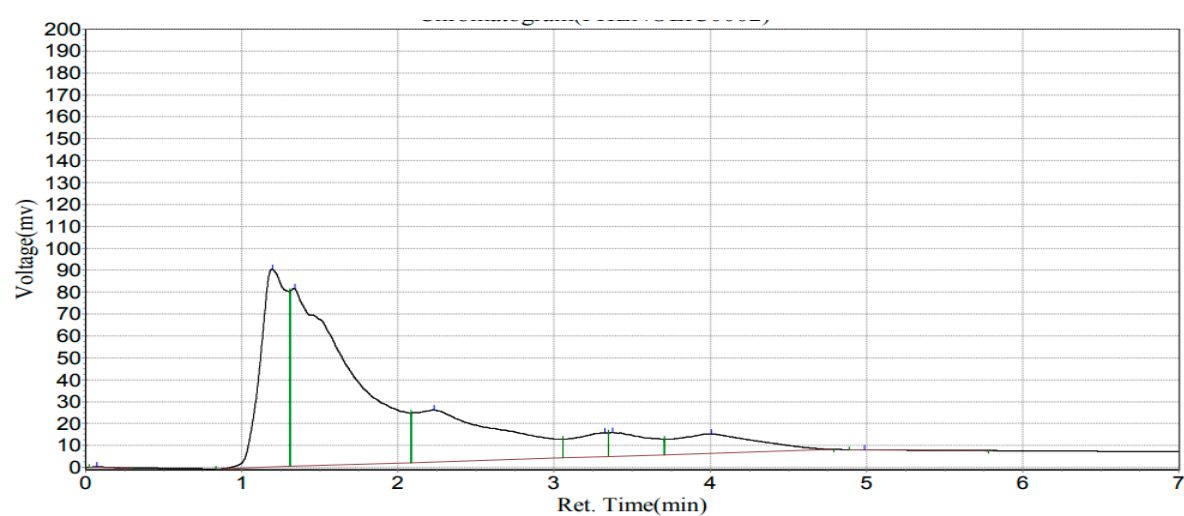

**Figure S15.** HPLC chromatogram for identification of phenolic compounds in the unfermented *C. dregei* leaves.

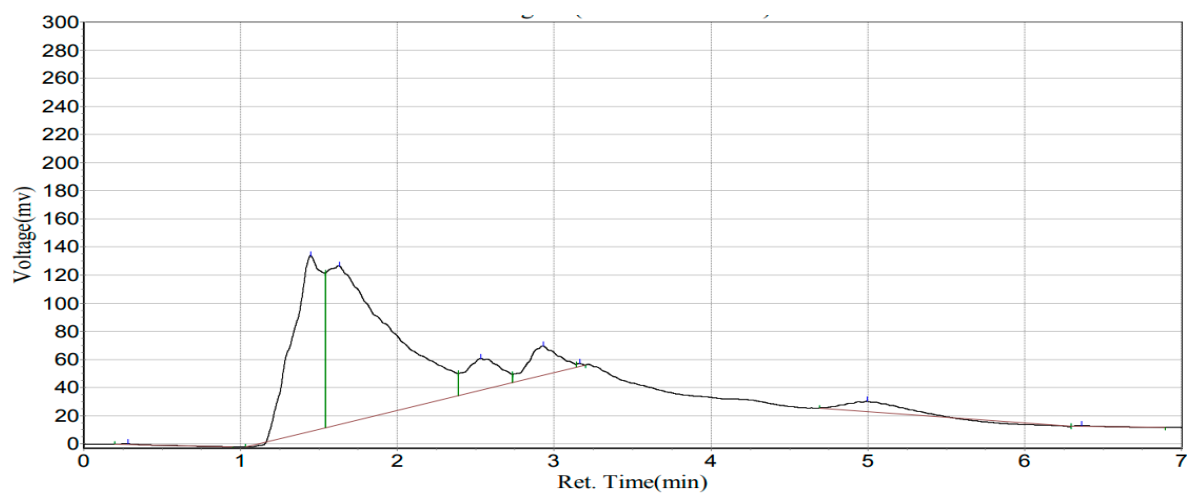

**Figure S16.** HPLC chromatogram for identification of phenolic compounds in the 3-days fermented *C. dregei* leaves.

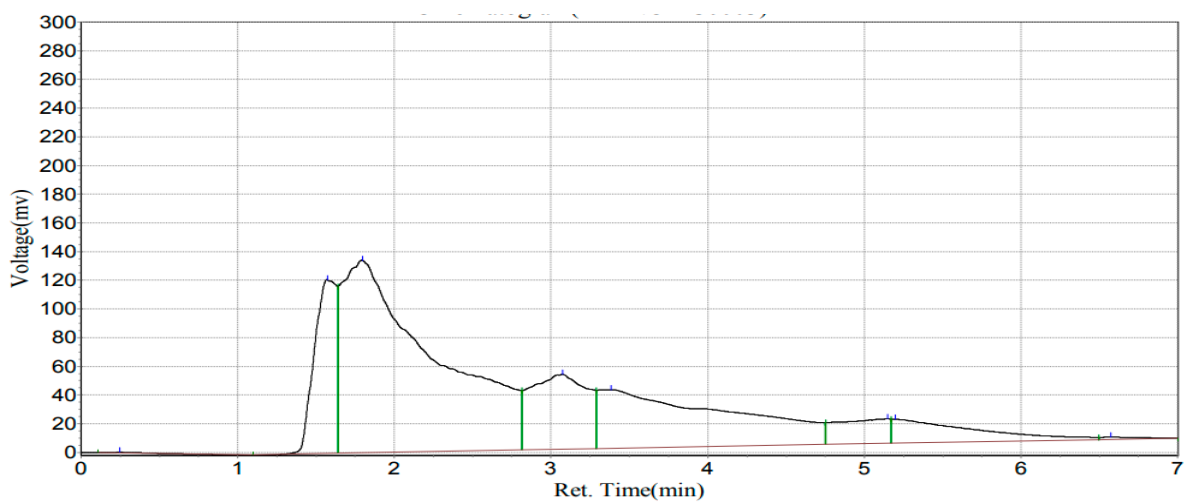

**Figure S17.** HPLC chromatogram for identification of phenolic compounds in the 5-days fermented *C. dregei* leaves.

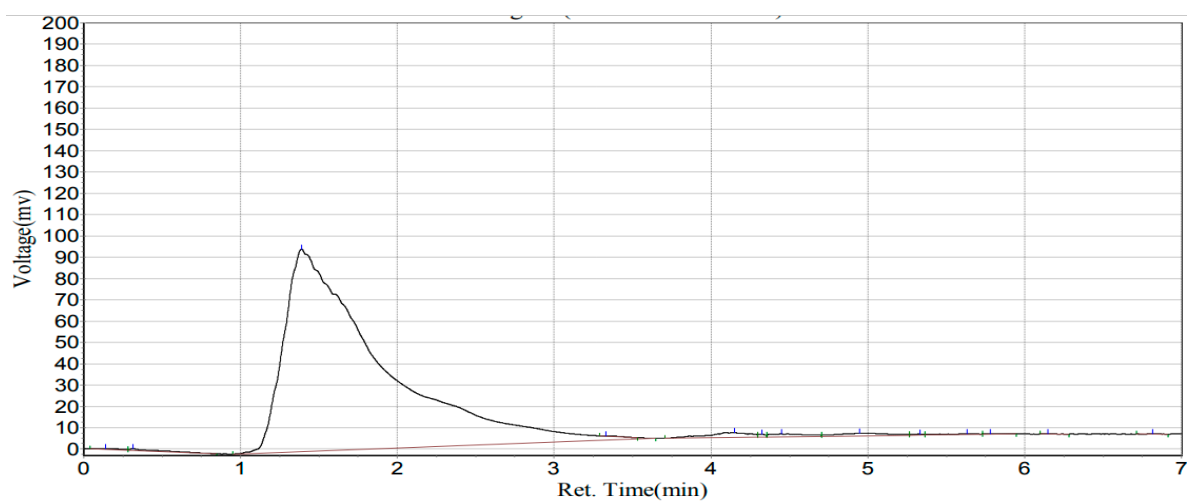

**Figure S18.** HPLC chromatogram for identification of bioflavonoid compounds in the unfermented *C. dregei* leaves.

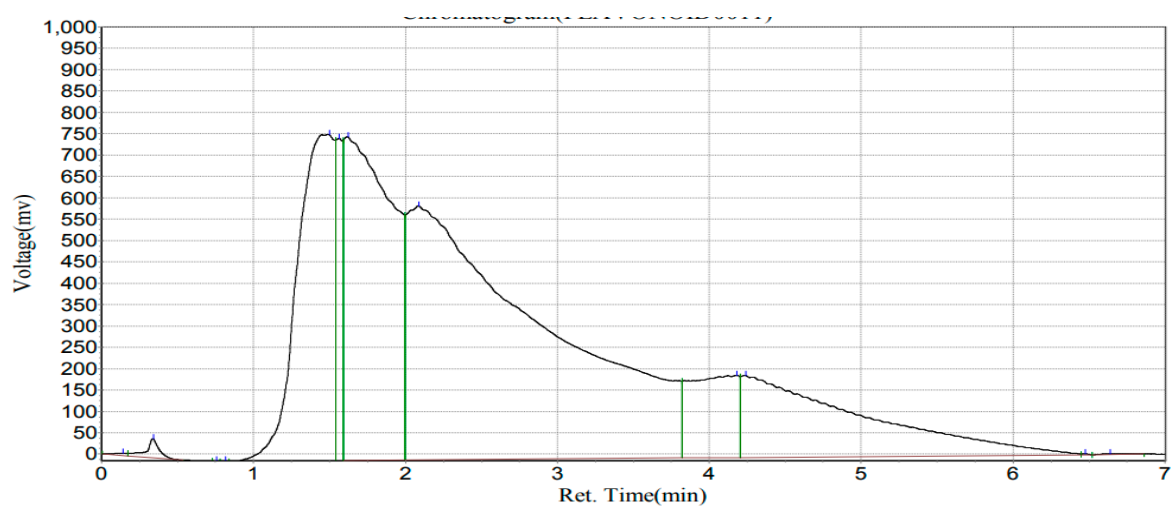

**Figure S19.** HPLC chromatogram for identification of bioflavonoid compounds in the 3-days fermented *C. dregei* leaves.

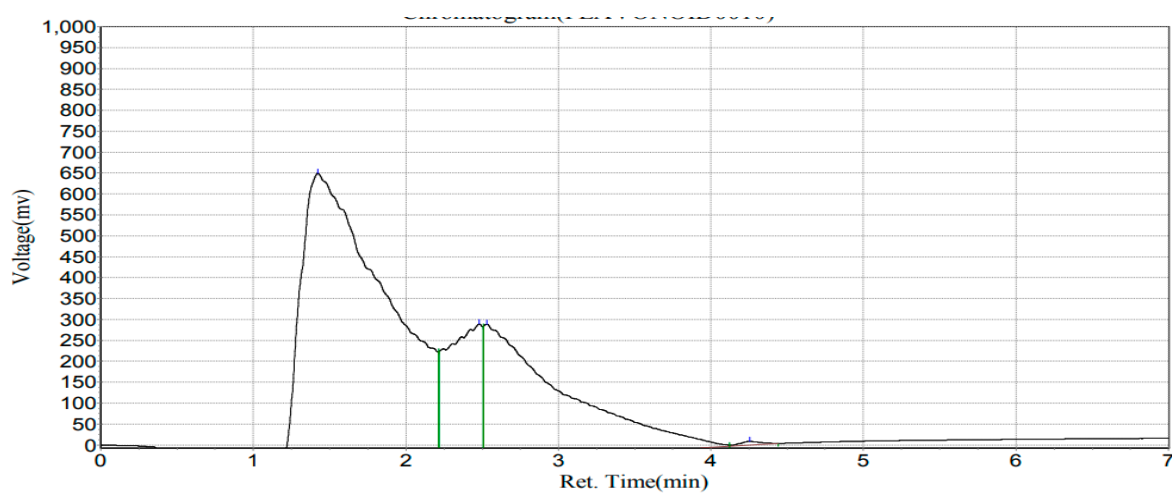

**Figure S20.** HPLC chromatogram for identification of bioflavonoid compounds in the 5-days fermented *C. dregei* leaves.

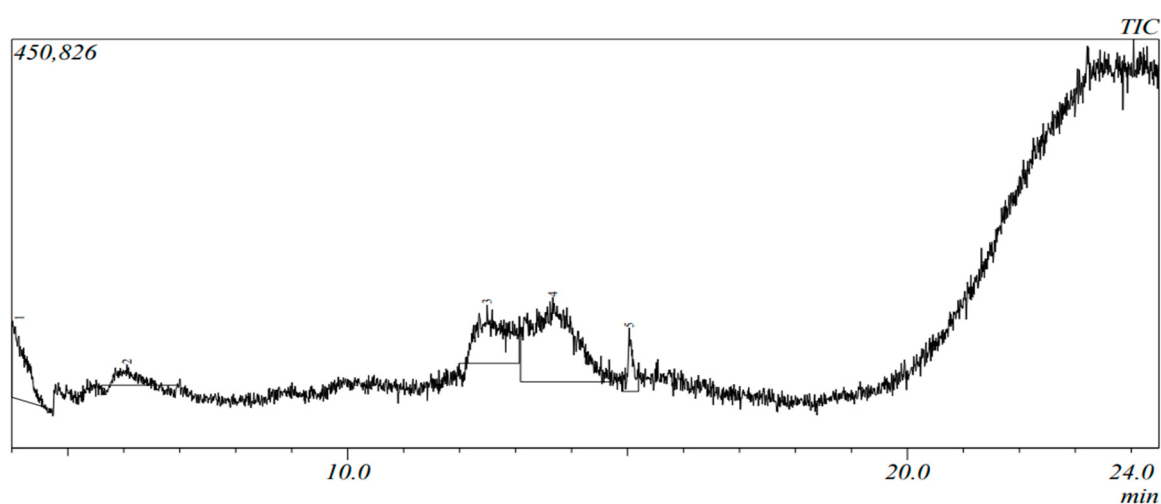

**Figure S21.** GC/MS chromatogram for identification of volatile phytochemicals in the unfermented *C. dregei* leaves.

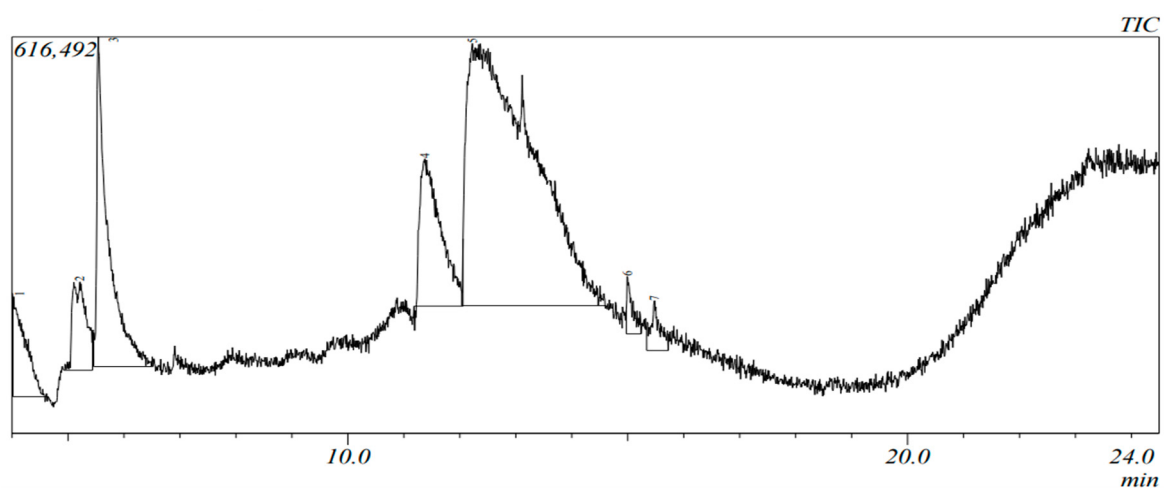

**Figure S22.** GC/MS chromatogram for identification of volatile phytochemicals in the 3-days fermented *C. dregei* leaves.

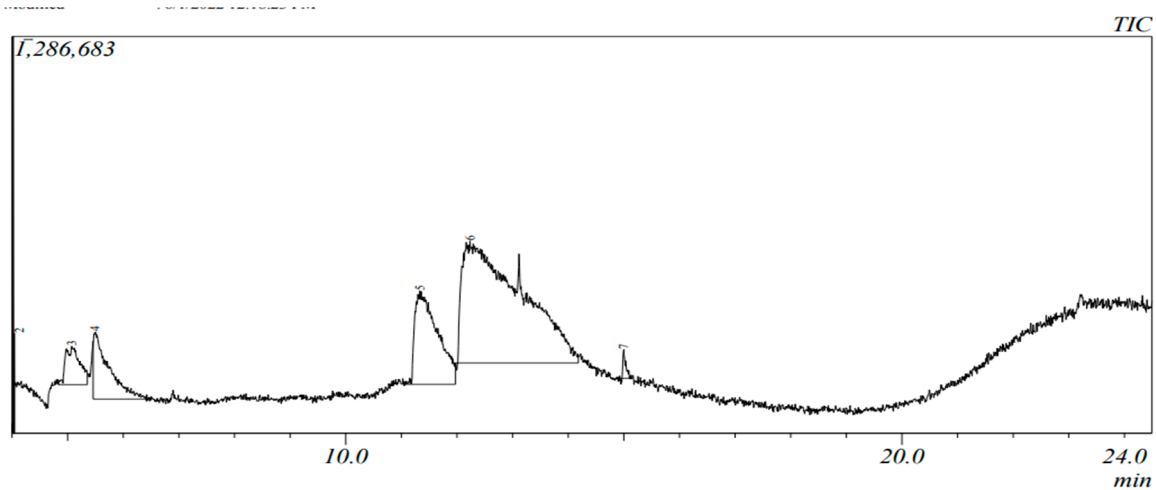

**Figure S23.** GC/MS chromatogram for identification of volatile phytochemicals in the 5-days fermented *C. dregei* leaves.
